# Supplementary material for: The Changing Role for Endomyocardial Biopsy in the Diagnosis of Giant-Cell Myocarditis
Source: Springer Nature journal article supplement (doi:10.1007/s40119-014-0028-5), 2014-05-08
Supplement: MOESM1 [file 9339374]

- Giant-cell myocarditis (GCM) is a rare disorder, characterized by diffuse inflammatory lymphocytic infiltration of the myocardium and multi-nucleated giant cells, in the absence of granulomas.
- Endomyocardial biopsy (EMB) is central to the diagnosis of GCM. Multi-nucleated giant cells are seen at the edges of inflammation with significant myocyte destruction. The diagnostic yield, however, is sufficiently low that repeat EMB should be considered if a high index of suspicion persists.
- Median survival of GCM patients who undergo cardiac transplantation is higher than those who are treated with immunosuppression alone.
- This manuscript illustrates, with a case, the changing role for EMB in the current era in the diagnosis of GCM.

This summary slide represents the opinions of the authors. No funding or sponsorship was received for this study or publication of this article. For a full list of acknowledgments and conflicts of interest for all authors of this article, please see the full text online. Copyright © The Author(s) 2014. Creative Commons Attribution Noncommercial License (CC BY-NC).
